# Supplementary material for: Potential for Peatland Water Table Depth Monitoring Using Sentinel-1 SAR Backscatter: Case Study of Forsinard Flows, Scotland, UK
Source: MDPI journal article supplement (doi:10.3390/rs15071900), 2023-03-31
Supplement: s1 [file s1]

Archive with 1 entries (1 files):
- remotesensing-2283324-supplementary.pdf
